# Supplementary material for: Cortisol levels in different tissue samples in posttraumatic stress disorder patients versus controls: a systematic review and meta-analysis protocol
Source: Springer Nature journal article supplement (doi:10.1186/s13643-018-0936-x), 2019-01-07
Supplement: MOESM4 [file 16382286]

# Eligibility form

Record ID

\_\_\_\_\_

Reviewer initials:

\_\_\_\_\_

Date form completed

\_\_\_\_\_  
(dd/mm/yyyy)

## Study design

1. Any study design comparing cortisol levels between PTSD patients and controls? (only original studies, not reviews)

- Yes  
 No  
 Unclear

Notes (can include quotes from the text, location in the text and reviewer explanations)

\_\_\_\_\_

## Participants

2. Study in adults, aged 18 years and older?

- Yes  
 No  
 Unclear

Notes (can include quotes from the text, location in the text and reviewer explanations)

\_\_\_\_\_

3. PTSD patients with current PTSD according to DSM/ICD criteria?

- Yes  
 No  
 Unclear

Notes (can include quotes from the text, location in the text and reviewer explanations)

\_\_\_\_\_

## Exposures

4. Trauma exposure fulfilling DSM/ICD criteria occurred at least a month prior to assessment? (in patients and trauma exposed controls)

- Yes  
 No  
 Unclear

Notes (can include quotes from the text, location in the text and reviewer explanations)

\_\_\_\_\_

5. Controls without a history of prior PTSD (lifetime PTSD)?

- Yes  
 No  
 Unclear

Notes (can include quotes from the text, location in the text and reviewer explanations)

---

### Comparisons

6. Cortisol levels compared between which groups (tick all that apply)

- PTSD patients and trauma exposed controls (TEC)  
 PTSD patients and trauma unexposed controls (TUC)  
 PTSD patients and all controls (both trauma exposed and trauma unexposed)  
 Other  
 Unclear/not stated

Notes (can include quotes from the text, location in the text and reviewer explanations)

---

### Outcomes

7. Study assesses baseline or basal cortisol levels? (Not psychological or pharmacological stress tests)

- Yes  
 No  
 Unclear

Notes (can include quotes from the text, location in the text and reviewer explanations)

---

8. Sufficient data to compute effects sizes (mean cortisol levels and standard deviations in patients and controls) stated in articles or could possibly be obtained from authors?

- Yes  
 No  
 Unclear

Notes (can include quotes from the text, location in the text and reviewer explanations)

---

### Timing

9. All relevant measures completed at least a month since trauma exposure (PTSD diagnostic status, cortisol levels)?

- Yes  
 No  
 Unclear

Notes (can include quotes from the text, location in the text and reviewer explanations)

---

### Reviewer decision

Include study in the review?

- Yes  
 No  
 Unclear/uncertain

Notes (can include quotes from the text, location in the text and reviewer explanations)

---

---

Is additional information required from the study authors before a final assessment can be made?

- Yes  
 No

---

What information is required before a decision can be made

---

---

**To be completed after both reviewers have completed individual eligibility review**

---

Do both reviewers agree?

- Yes  
 No  
 Unclear/uncertain

---

Notes (can include quotes from the text, location in the text and reviewer explanations)

---

---

Third reviewer decision (if both reviewers don't agree)

- Include  
 Exclude

---

Study included?

- Yes  
 No

---

Reason for exclusion

---

---

Retain study for:

- Background/discussion  
 Review of references  
 Other

---

Notes

---
