# Supplementary material for: Cortisol levels in different tissue samples in posttraumatic stress disorder patients versus controls: a systematic review and meta-analysis protocol
Source: Springer Nature journal article supplement (doi:10.1186/s13643-018-0936-x), 2019-01-07
Supplement: MOESM5 [file 16382286]

# Study Information

Record ID

\_\_\_\_\_

Study ID:

\_\_\_\_\_  
 ((surname of first author and year first full  
 report of study was published e.g. Smith 2001) )

Report ID  
 (if there are multiple reports of this study)

\_\_\_\_\_  
 ((surname of first author and year this report was  
 published e.g. Smith 2001) )

Report IDs of other reports of this study (e.g.  
 duplicate publications, follow-up studies)

\_\_\_\_\_  
 (Multiple reports of the same study need to be  
 linked together)

Reviewer initials:

\_\_\_\_\_

Date form completed

\_\_\_\_\_  
 (dd/mm/yyyy)

Manuscript/report Title: (title of paper/ abstract/  
 report that data are extracted from)

\_\_\_\_\_

Authors:

\_\_\_\_\_

Journal:

\_\_\_\_\_

Publication date

\_\_\_\_\_

Page numbers:

\_\_\_\_\_

DOI:

\_\_\_\_\_

Reference details/citation (any other reference  
 details not entered above)

\_\_\_\_\_

Report author contact details (add all details listed  
 for the authors)

\_\_\_\_\_

---

Publication type

- Full report
- Brief report
- Letter
- Abstract
- Conference report
- Book chapter
- Other
- Not stated/unclear

---

Details regarding publication type

---

---

Study funding source (including role of funders)

---

---

Possible conflicts of interest (for study authors)

---

---

Notes:

---

# Eligibility form

Reviewer initials:

---

Date form completed

---

(dd/mm/yyyy)

## Study design

1. Any study design comparing cortisol levels between PTSD patients and controls? (only original studies, not reviews)

- Yes  
 No  
 Unclear

Notes (can include quotes from the text, location in the text and reviewer explanations)

---

## Participants

2. Study in adults, aged 18 years and older?

- Yes  
 No  
 Unclear

Notes (can include quotes from the text, location in the text and reviewer explanations)

---

3. PTSD patients with current PTSD according to DSM/ICD criteria?

- Yes  
 No  
 Unclear

Notes (can include quotes from the text, location in the text and reviewer explanations)

---

## Exposures

4. Trauma exposure fulfilling DSM/ICD criteria occurred at least a month prior to assessment? (in patients and trauma exposed controls)

- Yes  
 No  
 Unclear

Notes (can include quotes from the text, location in the text and reviewer explanations)

---

5. Controls without a history of prior PTSD (lifetime PTSD)?

- Yes  
 No  
 Unclear

Notes (can include quotes from the text, location in the text and reviewer explanations)

---

## Comparisons

6. Cortisol levels compared between which groups (tick all that apply)

- PTSD patients and trauma exposed controls (TEC)  
 PTSD patients and trauma unexposed controls (TUC)  
 PTSD patients and all controls (both trauma exposed and trauma unexposed)  
 Other  
 Unclear/not stated

Notes (can include quotes from the text, location in the text and reviewer explanations)

---

## Outcomes

7. Study assesses baseline or basal cortisol levels? (Not psychological or pharmacological stress tests)

- Yes  
 No  
 Unclear

Notes (can include quotes from the text, location in the text and reviewer explanations)

---

8. Sufficient data to compute effects sizes (mean cortisol levels and standard deviations in patients and controls) stated in articles or could possibly be obtained from authors?

- Yes  
 No  
 Unclear

Notes (can include quotes from the text, location in the text and reviewer explanations)

---

## Timing

9. All relevant measures completed at least a month since trauma exposure (PTSD diagnostic status, cortisol levels)?

- Yes  
 No  
 Unclear

Notes (can include quotes from the text, location in the text and reviewer explanations)

---

## Reviewer decision

Include study in the review?

- Yes  
 No  
 Unclear/uncertain

Notes (can include quotes from the text, location in the text and reviewer explanations)

---

Is additional information required from the study authors before a final assessment can be made?

- Yes  
 No

---

What information is required before a decision can be made

---

**To be completed after both reviewers have completed individual eligibility review**

Do both reviewers agree?

- Yes  
 No  
 Unclear/uncertain

---

Notes (can include quotes from the text, location in the text and reviewer explanations)

---

---

Third reviewer decision (if both reviewers don't agree)

- Include  
 Exclude

---

Study included?

- Yes  
 No

---

Reason for exclusion

---

---

Retain study for:

- Background/discussion  
 Review of references  
 Other

---

Notes

---

# Population And Setting

## Population and setting

**Include comparative information for each group (i.e. controls) if available.**

**Can include quotes from the text.**

1. Country and City of study

\_\_\_\_\_

Notes for above (can include quotes from the text, location in the text and reviewer explanations)

\_\_\_\_\_

2. Population description  
(from which study participants are drawn)

\_\_\_\_\_

Notes for above (can include quotes from the text, location in the text and reviewer explanations)

\_\_\_\_\_

3. Setting  
(including location and social context)

\_\_\_\_\_

Notes for above (can include quotes from the text, location in the text and reviewer explanations)

\_\_\_\_\_

4. Socio-economic status of participants

\_\_\_\_\_

Notes for above (can include quotes from the text, location in the text and reviewer explanations)

\_\_\_\_\_

5. Inclusion criteria:

\_\_\_\_\_

Notes for above (can include quotes from the text, location in the text and reviewer explanations)

\_\_\_\_\_

6. Exclusion criteria:

\_\_\_\_\_

Notes for above (can include quotes from the text, location in the text and reviewer explanations)

\_\_\_\_\_

---

7. Method/s of recruitment of participants

---

---

Notes for above (can include quotes from the text, location in the text and reviewer explanations)

---

---

8. Informed consent obtained

- Yes
- No
- Unclear/not stated

---

Notes for above (can include quotes from the text, location in the text and reviewer explanations)

---

---

Notes

---

# Study Methods

## Study methods

**Descriptions as stated in report/paper. Can include quotes from the text.**

1. Aim(s) of study

---

Notes for above (can include quotes from the text, location in the text and reviewer explanations)

---

2. Study design

- Cross-sectional study
- Case-control study
- Cohort study
- Clinical trial
- Other design type
- Not reported/unclear

Notes for above (can include quotes from the text, location in the text and reviewer explanations)

---

3. Start date:

---

4. End date:

---

5. Duration of participation (from recruitment to last follow-up)

---

Notes for above (can include quotes from the text, location in the text and reviewer explanations)

---

6. Method used to determine trauma exposure (in patients and controls)

---

Notes for above (can include quotes from the text, location in the text and reviewer explanations)

---

7. Method used to determine PTSD diagnostic status (in patients and controls)

---

Notes for above (can include quotes from the text, location in the text and reviewer explanations)

---



---

8. Method used to assess for comorbidity (in patients and controls)

---

Notes for above (can include quotes from the text, location in the text and reviewer explanations)

---

---

10. Number of study groups/arms

---

---

11. Types of control groups included (Tick all that apply)

- Trauma exposed controls
- Trauma unexposed controls
- Combined trauma exposed and unexposed controls
- Trauma exposure of controls not determined/defined
- Other types of controls

---

Notes for above (can include quotes from the text, location in the text and reviewer explanations)

---

---

12. Ethical approval obtained for study

- Yes
- No
- Unclear/Not stated

---

Notes for above (can include quotes from the text, location in the text and reviewer explanations)

---

---

Notes

---

## Modified Newcastle-Ottawa Scale (NOS)

### Domain of evaluation: Methods for selecting study participants (i.e. Selection bias)

Is the source population (cases, controls, cohorts) appropriate and representative of the population of interest?

Example of low risk of bias: A consecutive sample or random selection from a population that is representative of the condition under study.

Example of moderate risk of bias: A consecutive sample or random selection from a population that is not highly representative of the condition under study.

Example of high risk of bias: The source population cannot be defined or enumerated (i.e. volunteering or self-recruitment).

- Definitely no (high risk of bias)  
 Mostly no  
 Mostly yes  
 Definitely yes (low risk of bias)

### Domain of evaluation: Methods to control confounding (i.e. Performance bias)

Is the sample size adequate and is there sufficient power to detect a meaningful difference in the outcome of interest?

Example of low risk of bias: Sample size was adequate and there was sufficient power to detect a difference in the outcome.

Example of high risk of bias: Sample size was small and there was not enough power to test outcome of interest.

- Definitely no (high risk of bias)  
 Mostly no  
 Mostly yes  
 Definitely yes (low risk of bias)

Did the study identify and adjust for any variables or confounders that may influence the outcome?

Example of low risk of bias: The study identified and adjusted for all possible confounders that may influence estimates of association between exposure and outcome (i.e. Was the patient being treated for a medical condition such as chronic pain and was being prescribed opioids while on methadone treatment?)

Example of moderate risk of bias: The study identified and reported possible variables that may influence the outcome but did not explore the interaction.

Example of high risk of bias: The study either did not report any variables of influence or acknowledge variables of influence when it was clear they were present.

- Definitely no (high risk of bias)  
 Mostly no  
 Mostly yes  
 Definitely yes (low risk of bias)

**Domain of evaluation: Statistical methods (i.e. Detection bias)**

Did the study use appropriate statistical analysis methods relative to the outcome of interest?

Example of low risk of bias: The study reported use of appropriate statistical analysis as required (i.e. adjusting for an unbalanced distribution of a specific covariate among sexes, or correcting for multiple testing error)

Example of moderate risk of bias: The study either used correct statistical methods but did not report them well, or used the incorrect methods but reported them in detail.

Example of high risk of bias: The study did not use appropriate statistical analysis as required (i.e. did not adjust for an unbalanced distribution of a specific covariate among sexes, or correct for multiple testing error when necessary) or did not report them adequately.

- Definitely no (high risk of bias)  
 Mostly no  
 Mostly yes  
 Definitely yes (low risk of bias)

Is there little missing data and did the study handle it accordingly?

Example of low risk of bias: The study acknowledged missing data to be less than 10% and specified the method of handling it.

Example of moderate risk of bias: The study either had greater than 15% but they specified the method they used to handle it.

Example of high risk of bias: The study had greater than 15% missing data and did not handle it at all.

- Definitely no (high risk of bias)  
 Mostly no  
 Mostly yes  
 Definitely yes (low risk of bias)

**Domain of evaluation: Methods for measuring outcome variables (i.e. Information bias)**

Is the methodology of the outcome measurement explicitly stated and is it appropriate?

Example of low risk of bias: The study provides a detailed description of the outcome measure(s) which are appropriate for the outcome of interest.

Example of moderate risk of bias: The study provides a somewhat complete description of outcome measurements and they are justified.

Example of high risk of bias: The study provides limited information on the methods of measuring the outcome and the measure is not appropriate considering the outcome.

- Definitely no (high risk of bias)  
 Mostly no  
 Mostly yes  
 Definitely yes (low risk of bias)

Is there an objective assessment of the outcome of interest?

Example of low risk of bias: The study used objective methods to discern the outcome status of participants (i.e. laboratory measurements, medical records).

Example of moderate risk of bias: The study relied on subjective data as the primary method to discern outcome status of participants (i.e. self-report).

Example of high risk of bias: The study had limited reporting about assessment of outcomes.

- Definitely no (high risk of bias)  
 Mostly no  
 Mostly yes  
 Definitely yes (low risk of bias)

# Risk of bias (ROB) assessment

Reviewer initials:

\_\_\_\_\_

Date form completed

\_\_\_\_\_ (dd/mm/yyyy)

## Selection bias

**Selection bias refers to systematic differences between baseline characteristics of the groups that are compared**

### 1. Ascertainment of trauma exposure

Was trauma exposure based on DSM/ICD criteria and assessed using a valid and reliable measure and was the same method of ascertainment utilised in cases and controls?

- Low risk of bias - Trauma exposure was based on DSM/ICD criteria AND assessed with a validated trauma assessment measure (e.g. Life Events Checklist for DSM [LEC], Trauma History Questionnaire [THQ]) AND the same method of assessment was utilised in cases and controls
- High risk of bias - Trauma exposure not determined according to DSM/ICD criteria OR method to determine trauma exposure not well described or validated OR different method of assessment utilised in cases and controls
- Unclear risk of bias - Insufficient information to inform judgement (e.g. trauma exposure not ascertained or no clear information regarding methodology)

Rationale for rating given (can include quotes from the text and reviewer explanations for rating given)

\_\_\_\_\_

### 2. PTSD case ascertainment

Was PTSD case status based on DSM/ICD criteria and assessed using a valid and reliable measure (e.g. structured diagnostic interview) and was the same method of ascertainment utilised in cases and controls?

- Low risk of bias - PTSD diagnostic status was based on DSM/ICD criteria AND assessed with a validated assessment measure, such as a structured diagnostic interview (e.g. Clinician-Administered PTSD Scale for DSM [CAPS], Structured Clinical Interview for DSM disorder [SCID]) OR based on a specialist clinician (psychiatrist or psychologist) diagnosis utilising DSM/ICD criteria OR a self-report measure with proven validity and reliability as compared to the gold-standard evaluation (e.g. PTSD Checklist for DSM [PCL], Davidson Trauma Scale [DTS], AND the same method of assessment was utilised in cases and controls
- High risk of bias - PTSD diagnostic status was not determined according to DSM/ICD criteria OR method to determine trauma exposure not well described or validated (e.g. measure not validated or self-reported presence or absence of PTSD) OR different method of assessment utilised in cases and controls
- Unclear risk of bias - Insufficient information to inform judgement (e.g. no clear information regarding methodology)

---

Rationale for rating given (can include quotes from the text and reviewer explanations for rating given)

---

### 3. Inclusion and exclusion criteria

Were inclusion and exclusion factors applied appropriately and uniformly to cases and controls? [certain inclusion/exclusion factors may be specific to diagnostic group e.g. a lifetime history of PTSD as an exclusion factor in controls, but not cases]

- Low risk of bias - Critical inclusion/exclusion criteria were stated and were applied uniformly to cases and controls, as appropriate (e.g. use of steroid-containing medications an exclusion factor in both cases and controls)
  - High risk of bias - Inclusion/exclusion criteria were vague or unclear OR were not applied uniformly to cases and controls, as appropriate (e.g. use of steroid-containing medications an exclusion factor in controls, but not in cases)
  - Unclear risk of bias - Insufficient information to inform judgement (e.g. inclusion and exclusion criteria not stated)
- 

Rationale for rating given (can include quotes from the text and reviewer explanations for rating given)

---

### 4. Representative cases and controls

Were cases and controls recruited in an equivalent manner and adequately represent the population being studied?

- Low risk of bias - Consecutive or random sample of cases clearly representative of PTSD patients (e.g. all PTSD patients in a catchment area) and controls from a similar community setting as patients (e.g. both cases and controls sourced from military veterans) and recruitment was done in an equivalent manner or differing recruitment strategies unlikely to influence outcomes (e.g. community controls sourced through alternative routes, but well matched to patients)
  - High risk of bias - Sample of cases not obtained in a consecutive or random method and not clearly representative of PTSD patients (e.g. patients selected with rare features, such as severe dissociative or psychotic symptoms) OR controls not from a similar community setting as patients (e.g. other hospital patients or living in a different region) OR differing recruitment strategies that are likely to influence results were used (e.g. medical staff used as controls for community patients)
  - Unclear risk of bias - Insufficient information to inform judgement (e.g. recruitment and sampling strategies not clearly stated)
- 

Rationale for rating given (can include quotes from the text and reviewer explanations for rating given)

---

**Performance bias**

**Performance bias refers to systematic differences between groups in the care that is provided, or in exposure to factors other than the interventions of interest**

## 5. Confounding

Were confounding factors assessed for using standard, valid and reliable measures used consistently across all study participants and were confounding factors appropriately dealt with

- Low risk of bias - Major potential confounding factors (e.g. age, gender, comorbidity, medication use) were assessed for utilising validated measures used consistently in all participants (e.g. diagnostic interview for psychiatric comorbidity in both cases and controls) AND appropriately controlled for (e.g. similar between cases and controls, or controlled for in analysis [e.g. multivariate or subgroup analysis])
- High risk of bias - Major potential confounding factors (e.g. age, gender, comorbidity, medication use) were not assessed for OR were not assessed using validated measures consistently in all participants (e.g. self-proclaimed 'healthy' status in controls versus diagnostic interview in cases) OR were not appropriately controlled for (e.g. confounders handled differently in cases or controls or not accounted for in analysis)
- Unclear risk of bias - Insufficient information to inform judgement

Rationale for rating given (can include quotes from the text and reviewer explanations for rating given)

---

**Attrition bias**

**Attrition bias refers to systematic differences between groups in withdrawals from a study**

## 6. Incomplete outcome data

Were there few concerns regarding attrition and was missing data handled appropriately?

- Low risk of bias (any missing data unlikely to influence study outcomes) - No clear factors influencing attrition (e.g. response rates adequate and similar for cases and controls, no difference in dropout or exclusion between cases and controls) AND no or very limited (e.g. < 10%) missing outcome data and appropriate method utilized to handle missing outcome data (e.g. appropriate imputation method used)
- High risk of bias (missing data likely to influence study outcomes) - Clear factors influencing attrition (e.g. response rate unsatisfactory or different between cases and controls, large number lost to follow-up or different between cases and controls) OR a large proportion of missing data (e.g. > 15%) and missing data not handled appropriately (e.g. no or inappropriate imputation method used)
- Unclear risk of bias - Insufficient information (regarding attrition or missing data) to inform judgement

Rationale for rating given (can include quotes from the text and reviewer explanations for rating given)

---

**Detection bias**

**Detection bias refers to systematic differences between groups in how outcomes are determined**

7. Time period between exposure and outcome  
Was the time period between trauma exposure and outcome assessment (PTSD case ascertainment and cortisol levels obtained) at least a month and similar in PTSD cases and controls?

[does not apply to trauma unexposed controls]

- Low risk of bias - Time period between trauma exposure and assessment was at least a month and equivalent between groups (PTSD cases and controls) OR if time period since trauma exposure was not equivalent this was adequately controlled for in analysis
- High risk of bias - Time period between trauma exposure and assessment was less than a month OR was not equivalent between groups (PTSD cases and controls)
- Unclear risk of bias - Insufficient information to inform judgement (e.g. time period since trauma exposure not specified)

Rationale for rating given (can include quotes from the text and reviewer explanations for rating given)

## 8. Outcome assessments

Were outcomes (cortisol levels) assessed in a standard, valid and reliable method across all study participants and were assessors blinded to the case status (patient or control)?

[As cortisol is measured utilising objective quantitative assessment methods blinding is unlikely to influence outcome (cortisol levels) in most instances]

- Low risk of bias - Methods to obtain samples and determine cortisol levels adequately described, validated and performed consistently in cases and controls and blinding ensured or blinding status unlikely to influence outcomes
- High risk of bias - Methods to obtain samples or determine cortisol levels unclear or vague and performed differently in cases and controls or lack of blinding and absence of blinding likely to influence outcome status
- Unclear risk of bias - Insufficient information to inform judgement (e.g. cortisol ascertainment methods not described in the study)

Rationale for rating given (can include quotes from the text and reviewer explanations for rating given)

## 9. Statistical analysis

Were appropriate statistical analysis methods used?

- Low risk of bias - the statistical analysis approach was clearly described and was appropriate for the study outcomes (e.g. multivariate analysis performed, corrected for multiple testing)
- High risk of bias - the statistical analysis was not adequately described or was not clearly appropriate (e.g. only univariate statistics performed)
- Unclear risk of bias - Insufficient information to inform judgement (e.g. statistical analysis approach only partially described)

Rationale for rating given (can include quotes from the text and reviewer explanations for rating given)

**Reporting bias****Reporting bias refers to systematic differences between reported and unreported findings**

## 10. Selective reporting

Were the outcomes examined prespecified and are all the outcomes reported on (i.e. no evidence of selective outcome reporting)?

- Low risk of bias - All the outcomes were clearly prespecified (e.g. in the methods) and all stated outcomes are reported on
- High risk of bias - Outcomes were not prespecified or not all prespecified outcomes were reported on or additional outcomes that were not prespecified were reported on
- Unclear risk of bias - Insufficient information to inform judgement

Rationale for rating given (can include quotes from the text and reviewer explanations for rating given)

---

**Other biases**

## 11. Conflict of interest and funding

Were there funding sources or other potential sources of conflict of interest that may have influenced the study outcomes?

- Low risk of bias - Funding sources and the role played by funders and presence or absence of conflicts of interest explicitly stated and unlikely to influence study outcomes (e.g. funders unlikely to have a vested interest in a specific outcome or conflict of interest not related to the specific study)
- High risk of bias - Funding sources and the role played by funders and presence or absence of conflicts of interest stated and potential to influence study outcomes exists (e.g. funders likely to have a vested interest in a specific outcome or motivations may exist for investigator(s) to desire outcomes supporting their ideas or beliefs)
- Unclear risk of bias - Insufficient information to inform judgement (e.g. no explicit statement regarding funding sources or conflicts of interest)

Rationale for rating given (can include quotes from the text and reviewer explanations for rating given)

---

Any other potential sources of bias or factors that may influence risk of bias assessment

---

Notes

---



# Participants

1. Total number of participants

---

Notes for above (can include quotes from the text, location in the text and reviewer explanations)

---

2. Participation agreement or loss to follow-up, mortality, withdrawals and exclusions

---

Notes for above (can include quotes from the text, location in the text and reviewer explanations)

---

## PTSD patients

**Description as stated in report/paper. Can include quotes from the text.**

**If data for total sample described - add total sample data and clearly distinguish total sample data from PTSD patient data**

3. Description of PTSD patients

---

Notes for above (can include quotes from the text, location in the text and reviewer explanations)

---

4. Number of PTSD patients  
(or total PTSD pop. at start of study)

---

Notes for above (can include quotes from the text, location in the text and reviewer explanations)

---

5. Age of PTSD patients

---

Notes for above (can include quotes from the text, location in the text and reviewer explanations)

---

6. Sex of PTSD patients

---

Notes for above (can include quotes from the text, location in the text and reviewer explanations)

---

7. Race/ethnicity of PTSD patients

---

---

Notes for above (can include quotes from the text, location in the text and reviewer explanations)

---

8. Index trauma in PTSD patients (any descriptions included in report)

---

Notes for above (can include quotes from the text, location in the text and reviewer explanations)

---

9. Trauma severity in PTSD patients (e.g. number of lifetime traumas, number of types of traumas)

---

Notes for above (can include quotes from the text, location in the text and reviewer explanations)

---

10 Time since index trauma in PTSD patients

---

Notes for above (can include quotes from the text, location in the text and reviewer explanations)

---

11. Developmental stage during which trauma exposure occurred in patients (e.g. childhood, adolescence, adult)

---

Notes for above (can include quotes from the text, location in the text and reviewer explanations)

---

12. PTSD severity in patients

---

Notes for above (can include quotes from the text, location in the text and reviewer explanations)

---

13. Duration of PTSD /symptoms in patients

---

Notes for above (can include quotes from the text, location in the text and reviewer explanations)

---

14. Prior or current treatment received for PTSD

---

Notes for above (can include quotes from the text, location in the text and reviewer explanations)

---

15. Any medical/somatic comorbidities in PTSD patients

---

---

Notes for above (can include quotes from the text, location in the text and reviewer explanations)

---

16. Any psychiatric/mental health comorbidities in PTSD patients

---

Notes for above (can include quotes from the text, location in the text and reviewer explanations)

---

17. Any substance use or substance use disorders in PTSD patients

---

Notes for above (can include quotes from the text, location in the text and reviewer explanations)

---

18. Any current treatment/medication use in PTSD patients (in particular note steroid medications e.g. prednisone and psychiatric medications)

---

Notes for above (can include quotes from the text, location in the text and reviewer explanations)

---

19. Any physical parameters noted in patients e.g. BMI, blood pressure)

---

Notes for above (can include quotes from the text, location in the text and reviewer explanations)

---

20. Other relevant sociodemographics in PTSD patients

---

Notes for above (can include quotes from the text, location in the text and reviewer explanations)

---

21. Any PTSD subgroups measured/reported

---

Notes for above (can include quotes from the text, location in the text and reviewer explanations)

---

**PTSD controls****Description as stated in report/paper. Can include quotes from the text.****Add data for all control groups included and clearly distinguish between different controls groups**

22. Description of controls

\_\_\_\_\_

Notes for above (can include quotes from the text,  
location in the text and reviewer explanations)

\_\_\_\_\_

23. Number of control participants  
(or total pop. at start of study)

\_\_\_\_\_

Notes for above (can include quotes from the text,  
location in the text and reviewer explanations)

\_\_\_\_\_

24. Age of control participants

\_\_\_\_\_

Notes for above (can include quotes from the text,  
location in the text and reviewer explanations)

\_\_\_\_\_

25. Sex of control participants

\_\_\_\_\_

Notes for above (can include quotes from the text,  
location in the text and reviewer explanations)

\_\_\_\_\_

26. Race/ethnicity of control participants

\_\_\_\_\_

Notes for above (can include quotes from the text,  
location in the text and reviewer explanations)

\_\_\_\_\_

27. Index trauma in control participants (any  
descriptions included in report)

\_\_\_\_\_

Notes for above (can include quotes from the text,  
location in the text and reviewer explanations)

\_\_\_\_\_

28. Trauma severity in control participants (e.g.  
number of lifetime traumas, number of types of  
traumas)

\_\_\_\_\_

Notes for above (can include quotes from the text,  
location in the text and reviewer explanations)

\_\_\_\_\_

---

29. Time since index trauma in controls

---

---

Notes for above (can include quotes from the text, location in the text and reviewer explanations)

---

---

30. Developmental stage during which trauma exposure occurred in controls (e.g. childhood, adolescence, adult)

---

---

Notes for above (can include quotes from the text, location in the text and reviewer explanations)

---

---

31. PTSD symptom severity in controls (often symptom severity will be reported in trauma exposed controls)

---

---

Notes for above (can include quotes from the text, location in the text and reviewer explanations)

---

---

32. Duration of PTSD symptoms in controls (sometimes stated for trauma exposed controls)

---

---

Notes for above (can include quotes from the text, location in the text and reviewer explanations)

---

---

33. Any medical/somatic comorbidities in controls

---

---

Notes for above (can include quotes from the text, location in the text and reviewer explanations)

---

---

34. Any psychiatric/mental health comorbidities in controls

---

---

Notes for above (can include quotes from the text, location in the text and reviewer explanations)

---

---

35. Any substance use or substance use disorders in controls

---

---

Notes for above (can include quotes from the text, location in the text and reviewer explanations)

---

---

36. Any current treatment/medication use in controls (in particular note steroid medications e.g. prednisone)

---

---

Notes for above (can include quotes from the text, location in the text and reviewer explanations)

---

---

37. Other relevant sociodemographics in controls

---

---

Notes for above (can include quotes from the text, location in the text and reviewer explanations)

---

---

38. Any physical parameters noted in controls e.g. BMI, blood pressure)

---

---

Notes for above (can include quotes from the text, location in the text and reviewer explanations)

---

---

Notes:

---

# Outcomes

## Cortisol measurement

### Description as stated in report/paper. Can include quotes from the text.

1. Tissue types cortisol was measured in (tick all that apply)

- Plasma
- Serum
- Whole blood
- Saliva
- Urine
- Hair
- Nails
- Other
- Not specified/unclear

Notes for above (can include quotes from the text, location in the text and reviewer explanations)

---

2. Cortisol measured at single or multiple time points (e.g. multiple measurements in a single day or measurements repeated after a few weeks)

- Single time point
- Multiple time points
- Unclear/not stated

Notes for above (can include quotes from the text, location in the text and reviewer explanations)

---

3. Time period reflected by sample(s) (e.g. time of day; 24 hours; 1 month)

---

Notes for above (can include quotes from the text, location in the text and reviewer explanations)

---

4. Method(s) used to obtain samples from participants

---

Notes for above (can include quotes from the text, location in the text and reviewer explanations)

---

5. Sampling method standardised?

- Yes
- No
- Uncertain/unclear

Notes for above (can include quotes from the text, location in the text and reviewer explanations)

---

6. Method(s) used to analyse samples (in laboratory)

---

---

Notes for above (can include quotes from the text, location in the text and reviewer explanations)

---

---

7. Analysis method standardised and validated?

- Yes
  - No
  - Uncertain/unclear
- 

Notes for above (can include quotes from the text, location in the text and reviewer explanations)

---

---

8. Missing cortisol level data and imputation of missing data

---

Notes for above (can include quotes from the text, location in the text and reviewer explanations)

---

---

Notes

---



# Results

## Results

**Include comparative information for each group (i.e. controls) if available.**

**Description as stated in report/paper. Can include quotes from the text.**

1. Comparison made in cortisol levels for which groups

---

Notes for above (can include quotes from the text, location in the text and reviewer explanations)

---

2. Any subgroups

---

Notes for above (can include quotes from the text, location in the text and reviewer explanations)

---

3. Number of time points cortisol levels reported for (e.g. am and pm measures obtained or 6 weeks and 10 weeks post trauma)

---

Notes for above (can include quotes from the text, location in the text and reviewer explanations)

---

4. Length of timepoints reported (e.g. measure representing 24hrs or 2 weeks)

---

Notes for above (can include quotes from the text, location in the text and reviewer explanations)

---

5. Unit of measurement (e.g. mmol/l or mg/dl)

---

Notes for above (can include quotes from the text, location in the text and reviewer explanations)

---

6. Reference scales for cortisol (e.g. upper and lower limits)

---

Notes for above (can include quotes from the text, location in the text and reviewer explanations)

---

**Cortisol level in PTSD patients****Include comparative information for each group (i.e. subgroups) if available.****Description as stated in report/paper. Can include quotes from the text.**

7. Mean (M) cortisol level patients

\_\_\_\_\_

Notes for above (can include quotes from the text,  
location in the text and reviewer explanations)

\_\_\_\_\_

8. Standard deviation (SD) PTSD patients

\_\_\_\_\_

Notes for above (can include quotes from the text,  
location in the text and reviewer explanations)

\_\_\_\_\_

9. Number (N) of PTSD patients cortisol measured in

\_\_\_\_\_

Notes for above (can include quotes from the text,  
location in the text and reviewer explanations)

\_\_\_\_\_

10. Other statistics reported regarding cortisol  
levels in PTSD patients (E.g. medians (mdn),  
standard errors (SE), confidence intervals (CI),  
interquartile ranges (IQR) and ranges)

\_\_\_\_\_

Notes for above (can include quotes from the text,  
location in the text and reviewer explanations)

\_\_\_\_\_

**Cortisol level in controls****Include comparative information for each group (i.e. controls) if available.****Description as stated in report/paper. Can include quotes from the text.**

11. Mean (M) cortisol level controls

\_\_\_\_\_

Notes for above (can include quotes from the text,  
location in the text and reviewer explanations)

\_\_\_\_\_

12. Standard deviation (SD) controls

\_\_\_\_\_

Notes for above (can include quotes from the text,  
location in the text and reviewer explanations)

\_\_\_\_\_

13. Number (N) of controls cortisol measured in

\_\_\_\_\_

---

Notes for above (can include quotes from the text, location in the text and reviewer explanations)

---

---

14. Other statistics reported regarding cortisol levels in controls (E.g. medians (mdn), standard errors (SE), confidence intervals (CI), interquartile ranges (IQR) and ranges)

---

---

Notes for above (can include quotes from the text, location in the text and reviewer explanations)

---

---

### Statistical analysis

---

15. No. participants (patients and controls) for which cortisol levels are missing for and reasons

---

---

Notes for above (can include quotes from the text, location in the text and reviewer explanations)

---

---

16. No. participants moved from other group and reasons (e.g. in cohort studies patient and control status may change at different time points)

---

---

Notes for above (can include quotes from the text, location in the text and reviewer explanations)

---

---

17. Any other results reported

---

---

Notes for above (can include quotes from the text, location in the text and reviewer explanations)

---

---

18. Statistical methods used and appropriateness of these methods (e.g. multivariate analysis)

---

---

Notes for above (can include quotes from the text, location in the text and reviewer explanations)

---

---

19. Confounding factors/ effect modifiers accounted for in the analyses

---

---

Notes for above (can include quotes from the text, location in the text and reviewer explanations)

---

---

20. Reanalysis required?  
(specify why)

- Yes
- No
- Unclear/unsure

---

Notes for above (can include quotes from the text,  
location in the text and reviewer explanations)

---

---

21. Reanalysis possible?  
(specify why)

- Yes
- No
- Unclear/unsure

---

Notes for above (can include quotes from the text,  
location in the text and reviewer explanations)

---

---

Notes

---

# Applicability

---

1. Have important populations been excluded from the study?

- Yes
- No
- Unclear/unsure

---

Notes (can include quotes from the text, location in the text and reviewer explanations)

---

---

2. Does the study directly address the review question? (any issues of partial or indirect applicability)

- Yes
- No
- Unclear/unsure

---

Notes (can include quotes from the text, location in the text and reviewer explanations)

---

---

Notes

---

# Other Information

## Other information

**Descriptions as stated in report/paper. Can include quotes from the text.**

1. Study limitations

---

Notes for above (can include quotes from the text, location in the text and reviewer explanations)

---

2. Key conclusions of the study authors

---

Notes for above (can include quotes from the text, location in the text and reviewer explanations)

---

3. References to other relevant studies

---

4. Correspondence required for further study information (what and from whom)

---

5. Further study information requested (from whom, what and when)

---

6. Correspondence received (from whom, what and when)

---

Notes

---
